# Supplementary material
Source: ML conference proceedings conference paper supplement (https://proceedings.mlr.press/v139/zhou21e.html)
Supplement: Supplementary file 1 [file zhou21e-supp.pdf]

---

## Appendices for Towards Defending against Adversarial Examples via Attack-Invariant Features

### A. Attack implementation

In this section, we present supplementary information on attack implementation. We use Advtorch Toolbox<sup>1</sup> to implement the projected gradient descent method (PGD), the decoupling direction and norm method (DDN), the Carlini and Wagner method (CW), the Jacobian-based saliency map attack method (JSMA) and the spatial transform attack method (STA). The autoattack method (AA)<sup>2</sup>, the faster wasserstein attac method (FWA)<sup>3</sup> and the robust physical perturbation method (RP<sub>2</sub>)<sup>4</sup> are implemented from their open source codes. On *MNIST*, the main parameters of attacks are as follows:

- **PGD:** We use the  $L_\infty$  norm PGD method to craft adversarial examples. The default perturbation budget is set to 0.3. The default number of iterations is set to 40. The attack step size is set to 0.01.
- **DDN:** The number of iterations is set to 100. The factor to modify the norm at each iteration is set to 0.05. The number of quantization levels is set to 256.
- **CW:** We use the  $L_2$  norm CW method to craft adversarial examples. The maximum number of iterations is set to 1000. The confidence of the adversarial examples is set to 1. The initial value of the constant is set to 1.
- **JSMA:** The highest percentage of pixels can be modified is set to 1.0. The perturb length is set to 1.0.
- **STA:** The maximum number of iterations is set to 500. The number of search times to find the optimum is set to 20.
- **AA:** The default perturbation budget is set to 0.3. The default number of iterations is set to 100.
- **FWA:** The wasserstein adversarial examples are crafted by exploiting PGD. The default perturbation budget is set to 0.3. The number of iterations is set to 40. The learning rate is set to 0.1.

On *CIFAR-10*, the main parameters of attacks are as follows:

<sup>1</sup><https://github.com/codeaudit/advtorch>

<sup>2</sup><https://github.com/fra31/auto-attack>

<sup>3</sup><https://github.com/watml/fast-wasserstein-adversarial>

<sup>4</sup><https://github.com/tongwu2020/phattacks/tree/master/sign/experiment>

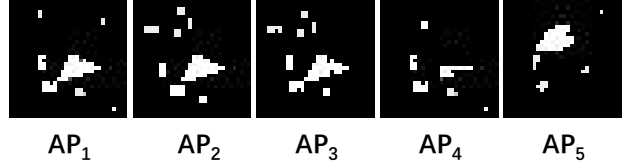

Figure 1. A visual illustration of five masks used to craft adversarial patches (AP).

- **PGD:** We use the  $L_\infty$  norm PGD method to craft adversarial examples. The default perturbation budget is set to  $8/255$ . The default number of iterations is set to 40. The attack step size is set to 0.01.
- **DDN:** The number of iterations is set to 100. The factor to modify the norm at each iteration is set to 0.05. The number of quantization levels is set to 256.
- **CW:** We use the  $L_2$  norm CW method to craft adversarial examples. The maximum number of iterations is set to 500. The confidence of the adversarial examples is set to 1. The initial value of the constant is set to 1.
- **JSMA:** The highest percentage of pixels can be modified is set to 1.0. The perturb length is set to 1.0.
- **STA:** The maximum number of iterations is set to 200. The number of search times to find the optimum is set to 20.
- **AA:** The default perturbation budget is set to  $8/255$ . The default number of iterations is set to 100.
- **FWA:** The wasserstein adversarial examples are crafted by exploiting PGD. The default perturbation budget is set to  $8/255$ . The number of iterations is set to 40. The learning rate is set to 0.01.

On *LISA*, we use five different masks to implement RP<sub>2</sub> for crafting adversarial examples. The masks are shown in Figure 1. The number of iterations of RP<sub>2</sub> is set to 300 and the learning rate is set to 0.01.

### B. Defense results

In this section, we present supplementary information on defense results. We use two different combinations of seen types of attacks to train our ARN model: (i) the targeted

055 PGD and the non-targeted PGD (“ARN<sub>PP</sub>”). (ii) the non-  
 056 targeted DDN and the non-targeted PGD (“ARN<sub>DP</sub>”). Fig-  
 057 ure 2, 3 shows examples which are restored by our *adversarial*  
 058 *noise removing network* (ARN) against pixel-constrained  
 059 attacks on *MNIST* and *CIFAR-10*. These attacks include  
 060 non-targeted  $L_\infty$  norm PGD (PGD<sub>N</sub>), targeted  $L_\infty$  norm  
 061 PGD (PGD<sub>T</sub>), non-targeted DDN (DDN<sub>N</sub>), non-targeted  
 062  $L_2$  norm CW (CW<sub>N</sub>), targeted JSMA (JSMA<sub>T</sub>) and non-  
 063 targeted AA (AA<sub>N</sub>). Figure 4 shows examples which are  
 064 restored by our ARN against spatial-constrained attacks.  
 065 These attacks include non-targeted STA (STA<sub>N</sub>), targeted  
 066 STA (STA<sub>T</sub>), non-targeted FWA (FWA<sub>N</sub>) and non-targeted  
 067 RP<sub>2</sub> (RP<sub>N</sub>). Figure 5 and 6 show adversarial examples and  
 068 restored examples on *LISA*. Five types of adversarial patches  
 069 (AP) are crafted by RP<sub>2</sub> and are added to natural examples  
 070 to generate adversarial examples. We use adversarial exam-  
 071 ples with two types of adversarial patches (AP<sub>1</sub> and AP<sub>2</sub>)  
 072 as training data to train our ARN model. The categories  
 073 corresponding to the class labels in *CIFAR-10* are as follows:

0) airplane, 1) car, 2) bird, 3) cat, 4) deer, 5) dog, 6) frog, 7)  
 horse, 8) boat and 9) truck.

### C. Leaked defenses

In this section, we present supplementary information on de-  
 fending under difficult scenarios where defenses are leaked.  
 We use ARN<sub>PP</sub>, APE-G<sub>PP</sub> and HGD<sub>PP</sub> as the leaked de-  
 fense models to craft adversarial examples by distinct  
 attacks. Figure 7 shows defense results of our ARN against  
 BPDA. The adversarial examples are crafted by jointly us-  
 ing PGD<sub>N</sub> and BPDA against our ARN. Figure 8, 9 and  
 10 show defense results of our ARN against white-box and  
 gray-box adaptive attacks. To be specific, the leaked de-  
 fense in Figure 8 is our ARN<sub>PP</sub> and the attack is PGD<sub>T</sub>. The  
 leaked defense in Figure 9 is APE<sub>PP</sub> and the attacks are  
 PGD<sub>T</sub>, CW<sub>N</sub> and CW<sub>T</sub>. The leaked defense in Figure 10  
 is HGD<sub>PP</sub> and the attacks are PGD<sub>T</sub>, DDN<sub>N</sub> and DDN<sub>T</sub>.

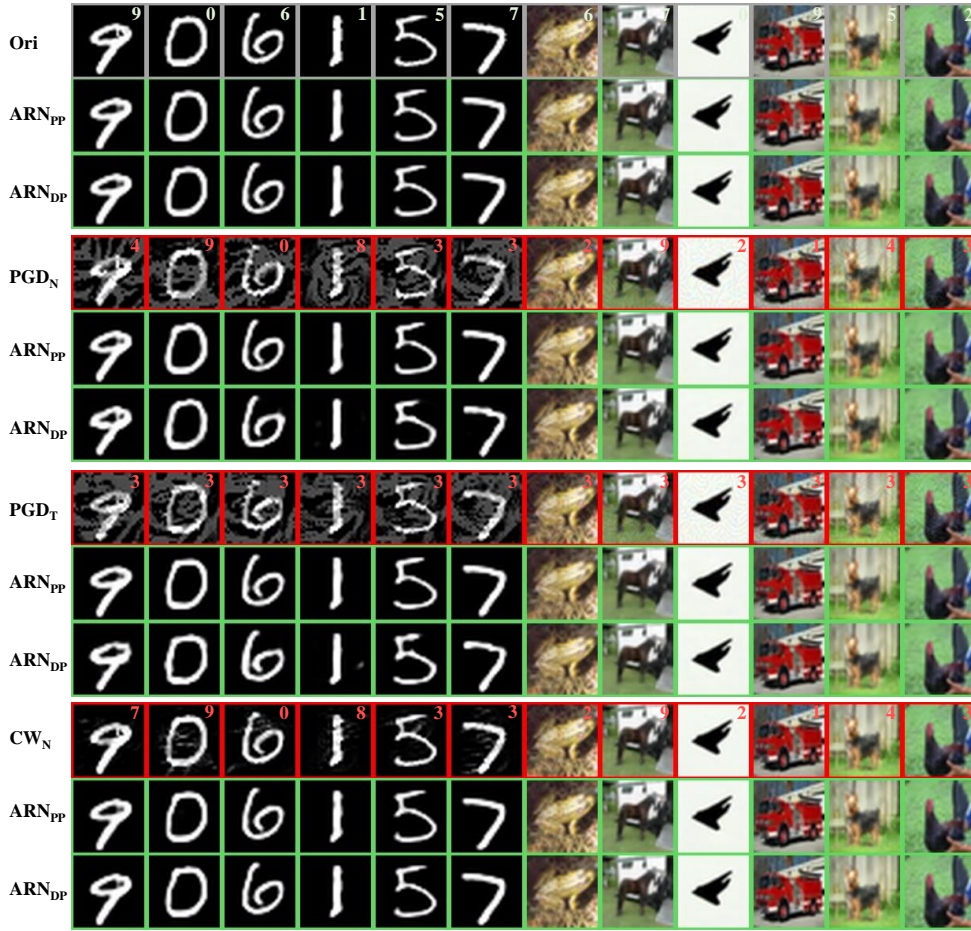

106 Figure 2. A visual illustration of adversarial examples and their restored examples. These adversarial examples are crafted by pixel-  
 107 constrained attacks.

110  
111  
112  
113  
114  
115  
116  
117  
118  
119  
120  
121  
122  
123  
124  
125  
126  
127  
128  
129  
130  
131  
132  
133  
134  
135  
136  
137  
138  
139  
140  
141  
142  
143  
144  
145  
146  
147  
148  
149  
150  
151  
152  
153  
154  
155  
156  
157  
158  
159  
160  
161  
162  
163  
164

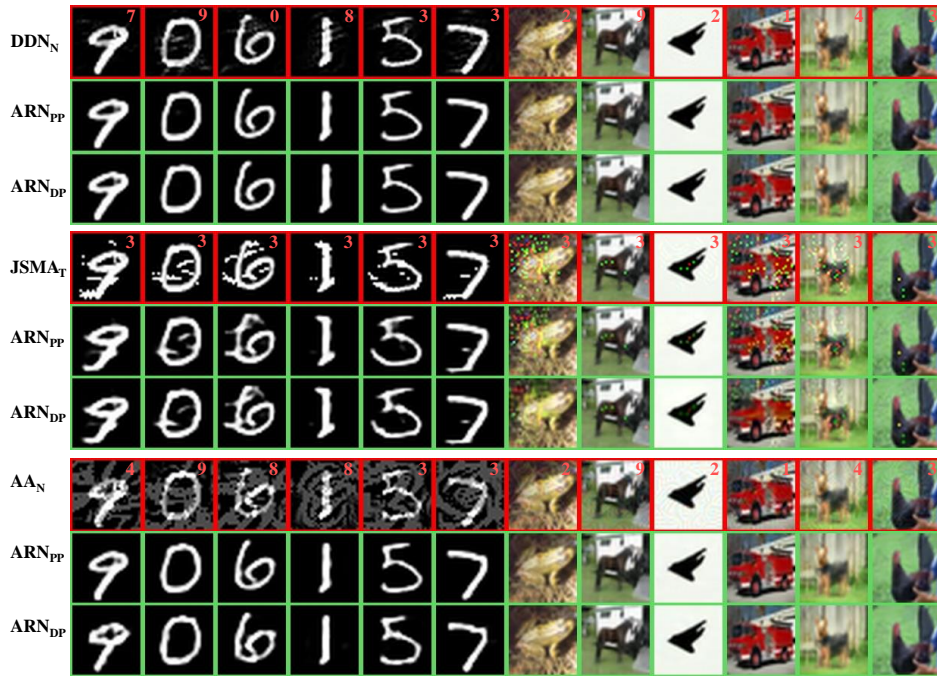

Figure 3. A visual illustration of adversarial examples and their restored examples. These adversarial examples are crafted by pixel-constrained attacks.

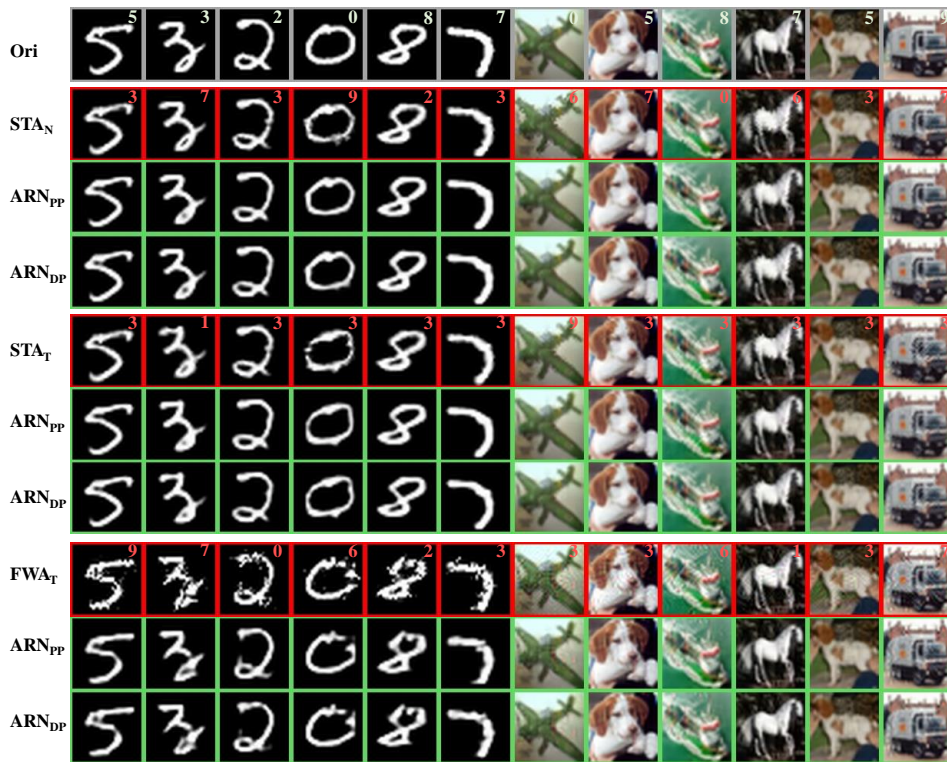

Figure 4. A visual illustration of adversarial examples and their restored examples. These adversarial examples are crafted by spatially-constrained attacks.

165  
166  
167  
168  
169  
170  
171  
172  
173  
174  
175  
176  
177  
178  
179  
180  
181  
182  
183  
184  
185  
186  
187  
188  
189  
190  
191  
192  
193  
194  
195  
196  
197  
198  
199  
200  
201  
202  
203  
204  
205  
206  
207  
208  
209  
210  
211  
212  
213  
214  
215  
216  
217  
218  
219

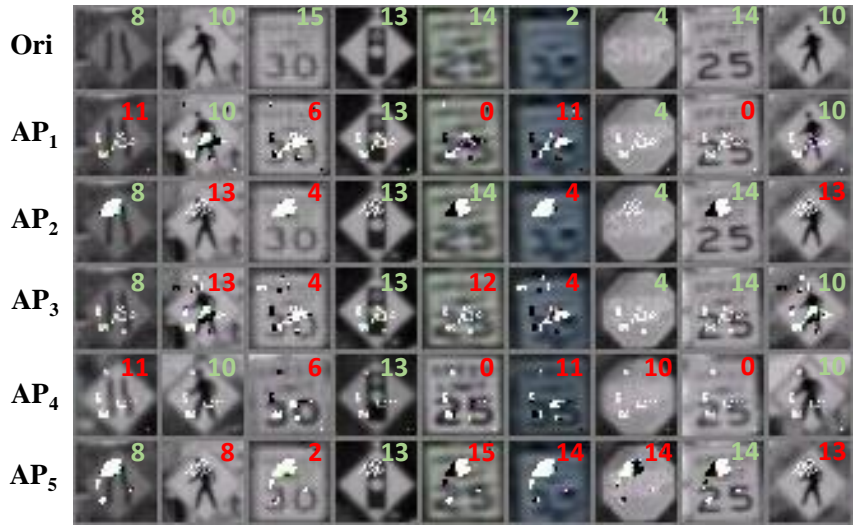

Figure 5. A visual illustration of adversarial examples on *LISA*. Five types of adversarial patches (AP) are crafted by  $RP_2$  and are added to natural examples to generate adversarial examples.

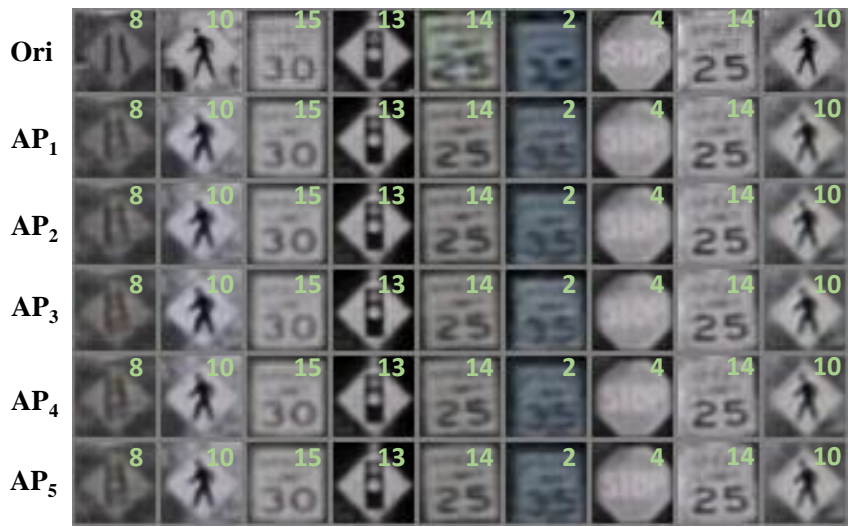

Figure 6. A visual illustration of restored examples on *LISA*. Five types of adversarial patches (AP) are crafted by  $RP_2$  and are added to natural examples to generate adversarial examples.

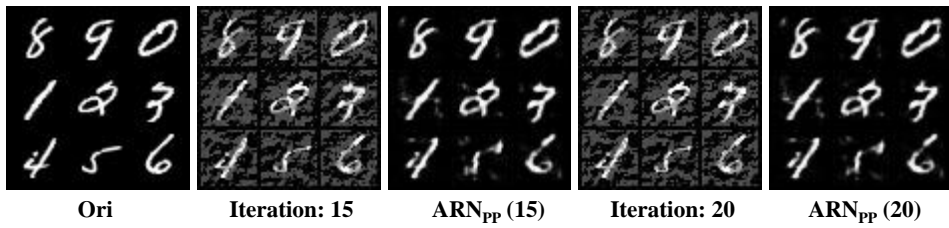

Figure 7. A visual illustration of adversarial examples and their restored examples against BPDA. The adversarial examples are crafted by jointly using BPDA and  $PGD_N$  against our ARN. The number of iterations of  $PGD_N$  is 15 and 20 respectively.

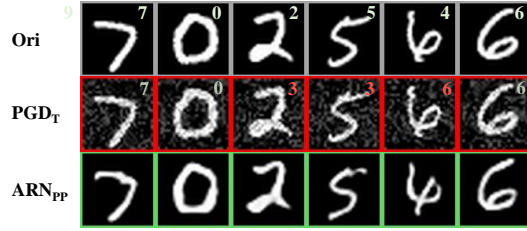

228 *Figure 8.* A visual illustration of defense results of our ARN against the white-box adaptive attack.

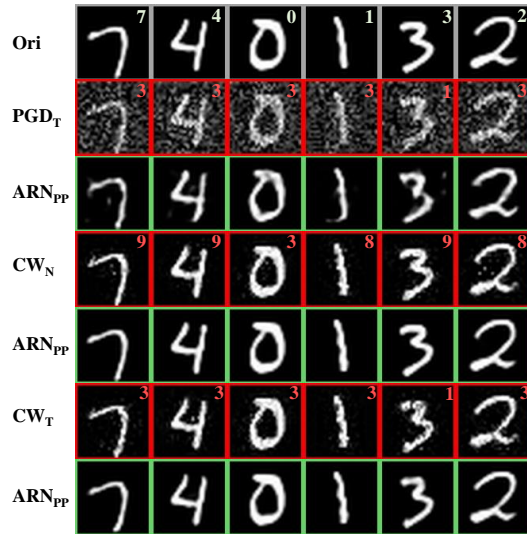

250 *Figure 9.* A visual illustration of defense results of our ARN against the gray-box adaptive attack. The local defense model is APE<sub>PP</sub>.

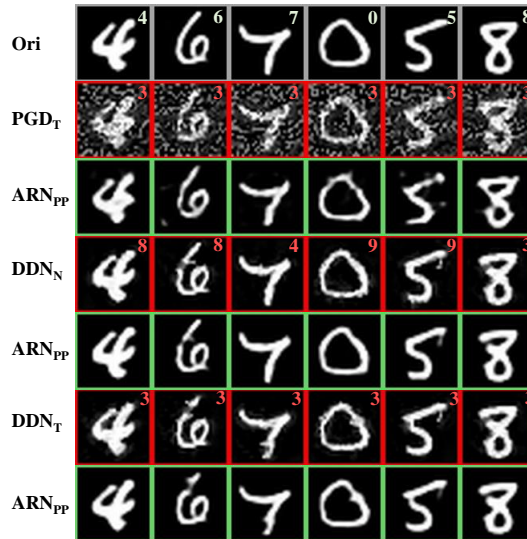

272 *Figure 10.* A visual illustration of defense results of our ARN against the gray-box adaptive attack. The local defense model is HGD<sub>PP</sub>.
